# Supplementary material for: fabH deletion increases DHA production in Escherichia coli expressing Pfa genes
Source: PubMed Central journal article supplement (PMC5992819; doi:10.1186/s12934-018-0928-5), 2018-06-08
Supplement: 12934_2018_928_MOESM1_ESM.pdf [file 12934_2018_928_MOESM1_ESM.pdf]

## ***fabH* deletion increases DHA production in *Escherichia coli* expressing *Pfa* genes**

Laura Giner-Robles, Beatriz Lázaro, Fernando de la Cruz\* and Gabriel Moncalián\*

### **Supplementary Figures:**

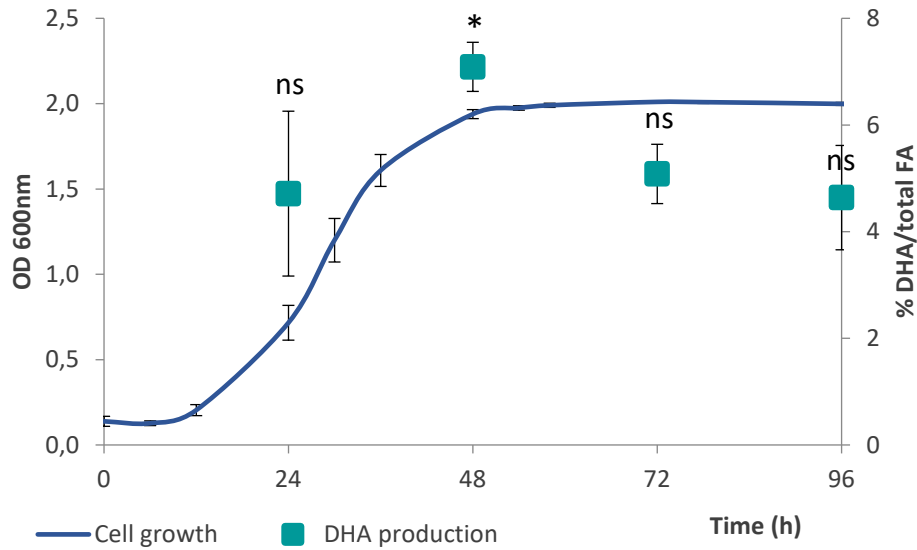

**Figure S1.** Kinetics of growth (line) and DHA production (squares) in BW-pDHA4 at 15°C for 96 h in three independent cultures. Bars indicate the mean and standard deviation. Asterisks indicate the degree of significance in the difference of DHA content among the samples (\*  $p < 0.05$ ; ns - not significant  $p > 0.05$ ).

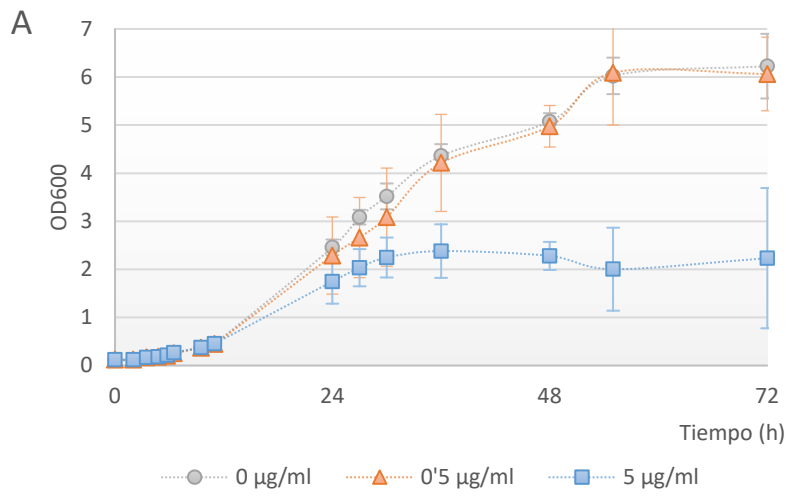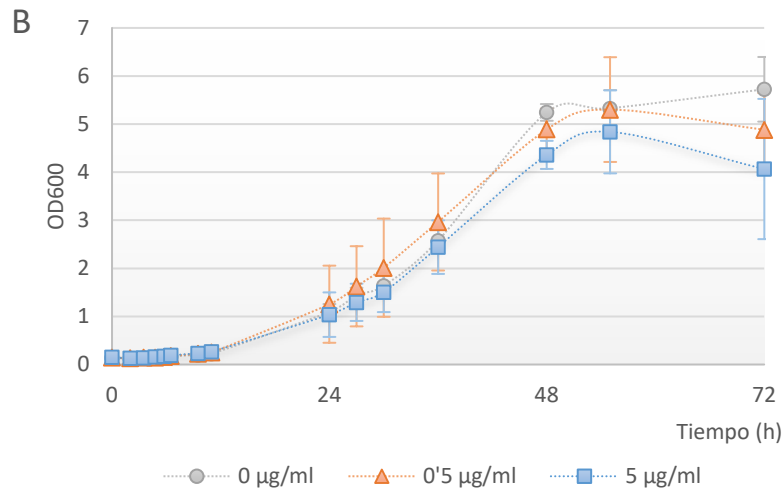

**Figure S2.** Growth curves of *E. coli* BW27783 (A) and *E. coli* BW27783 carrying plasmid pDHA4 (B) in absence of cerulenin (grey circles, 0 µg/ml), low concentration of cerulenin (orange triangle; 0.5 µg/ml), and high concentration of cerulenin (blue square; 5 µg/ml) for 72 h at 15 °C using 3 independent cultures. Mean and standard deviation is shown.
